# Supplementary material for: Resveratrol/Hydrazone Hybrids: Synthesis and Chemopreventive Activity against Colorectal Cancer Cells
Source: MDPI journal article supplement (doi:10.3390/pharmaceutics14112278), 2022-10-24
Supplement: s1 [file s1]

## **Supplementary Data**

### **Resveratrol/hydrazone Hybrids: Synthesis and Chemopreventive Activity against Colorectal Cancer Cells**

|                                                    |           |
|----------------------------------------------------|-----------|
| <sup>1</sup> H, <sup>13</sup> C NMR and MS spectra | <b>S1</b> |
| HPLC analysis                                      | <b>S2</b> |

## S1. $^1\text{H}$ , $^{13}\text{C}$ NMR and MS spectra

*N'*-((*E*)-2,4-dihydroxy-6-((*E*)-4-hydroxystyryl)benzylidene)-3-methoxybenzohydrazide (**6a**)

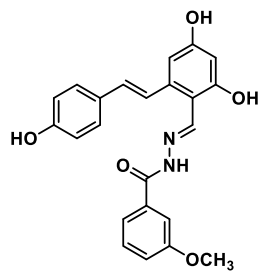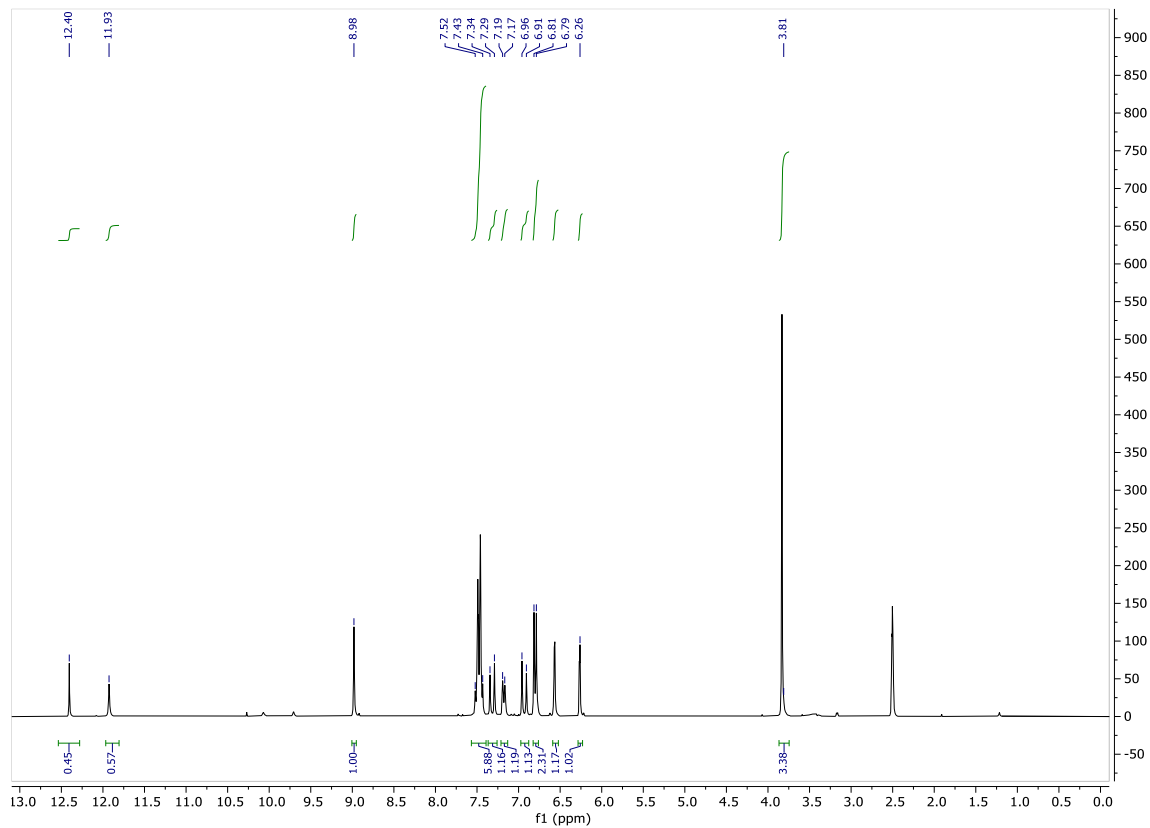

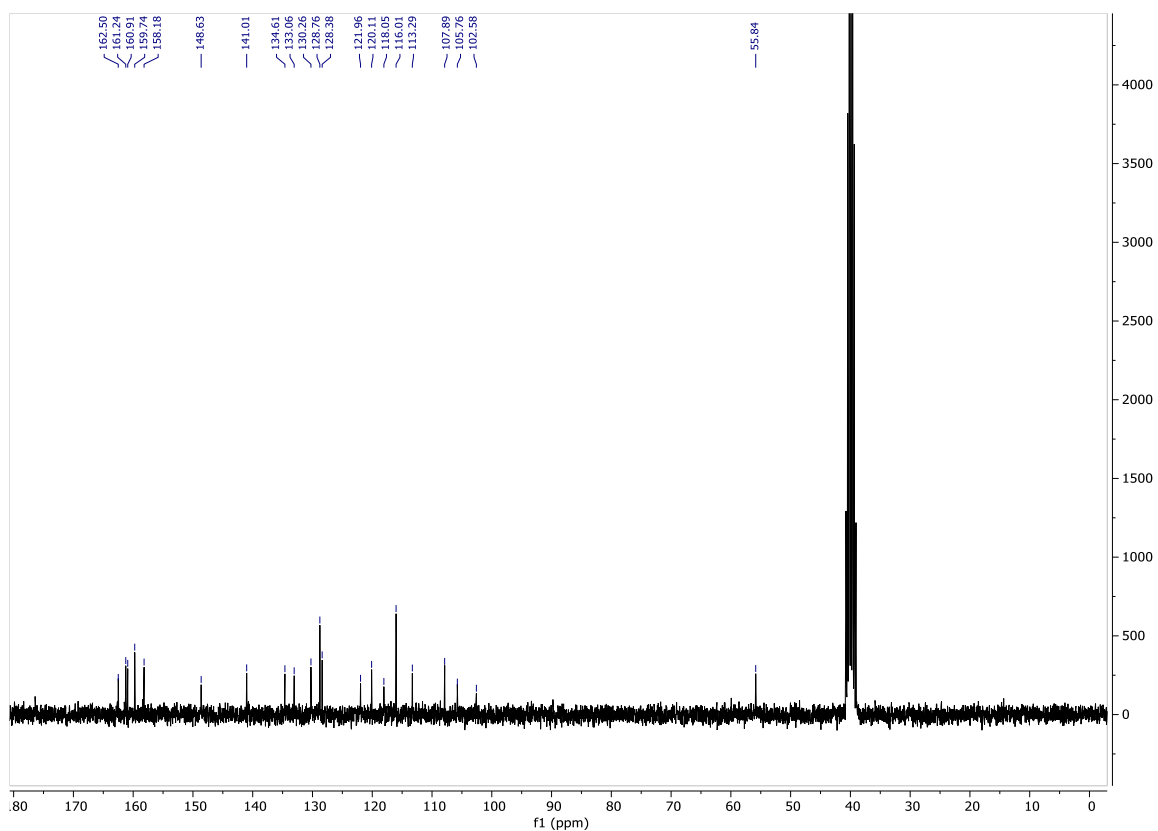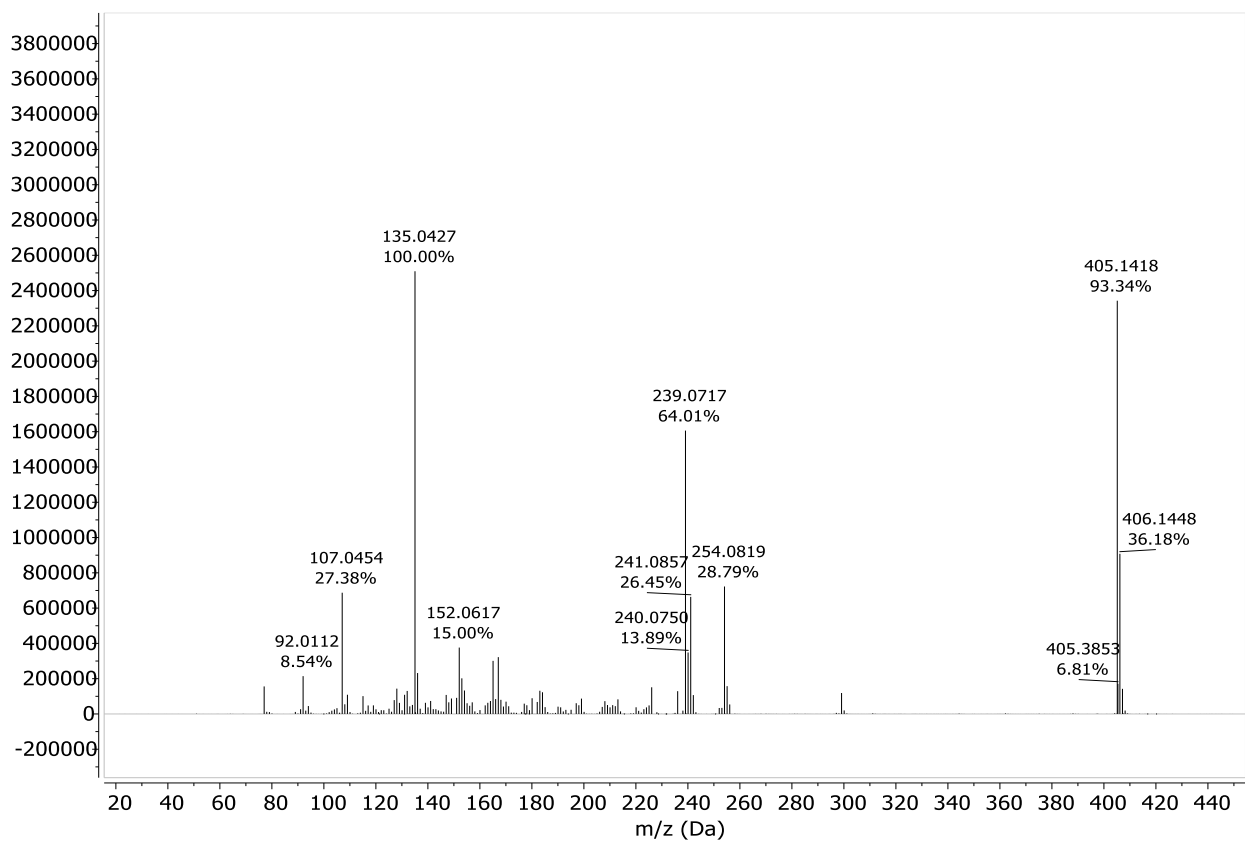

*N'*-((*E*)-2,4-dihydroxy-6-((*E*)-4-hydroxystyryl)benzylidene)-4-methoxybenzohydrazide (**6b**)

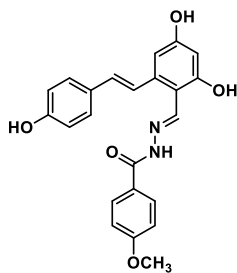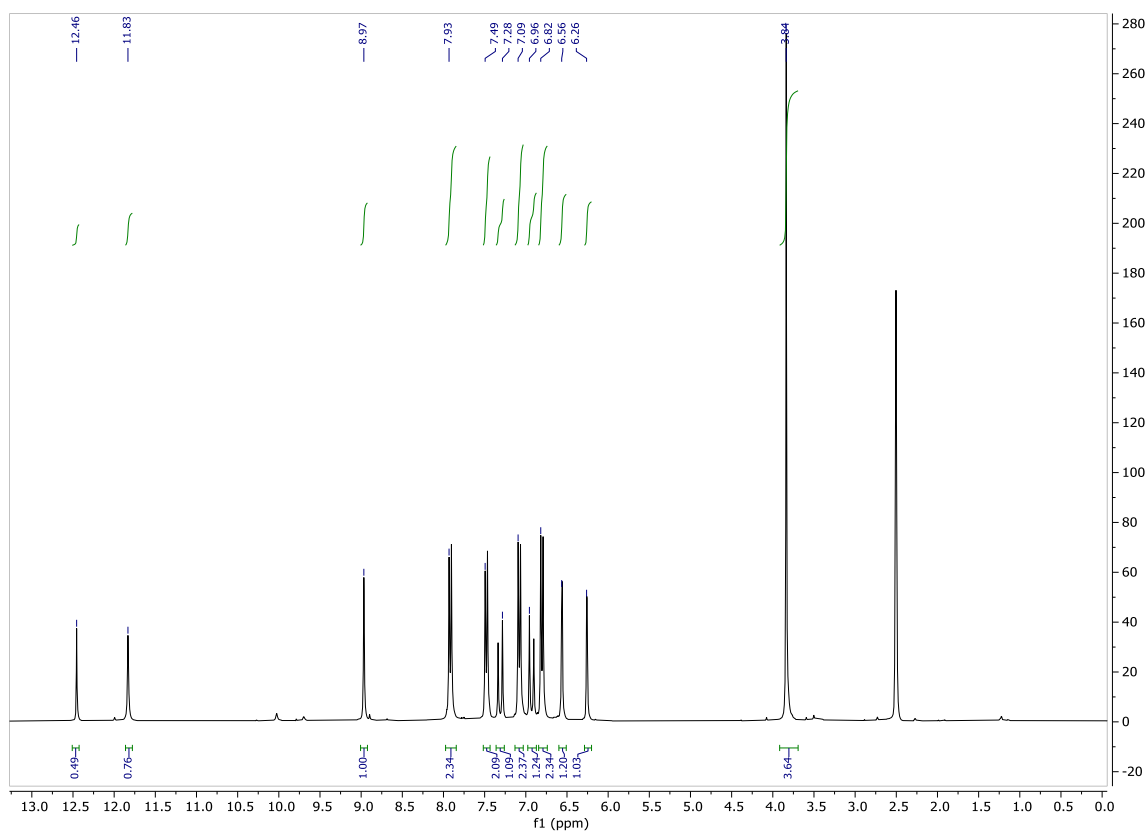

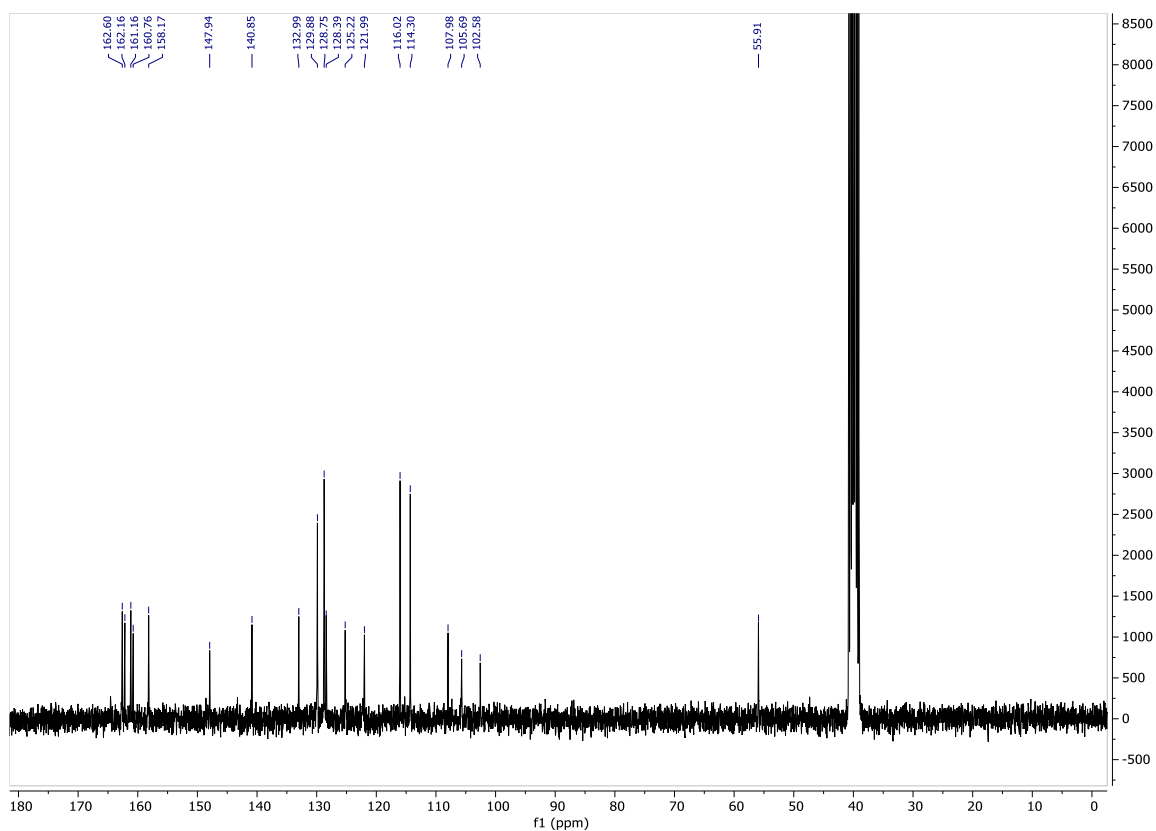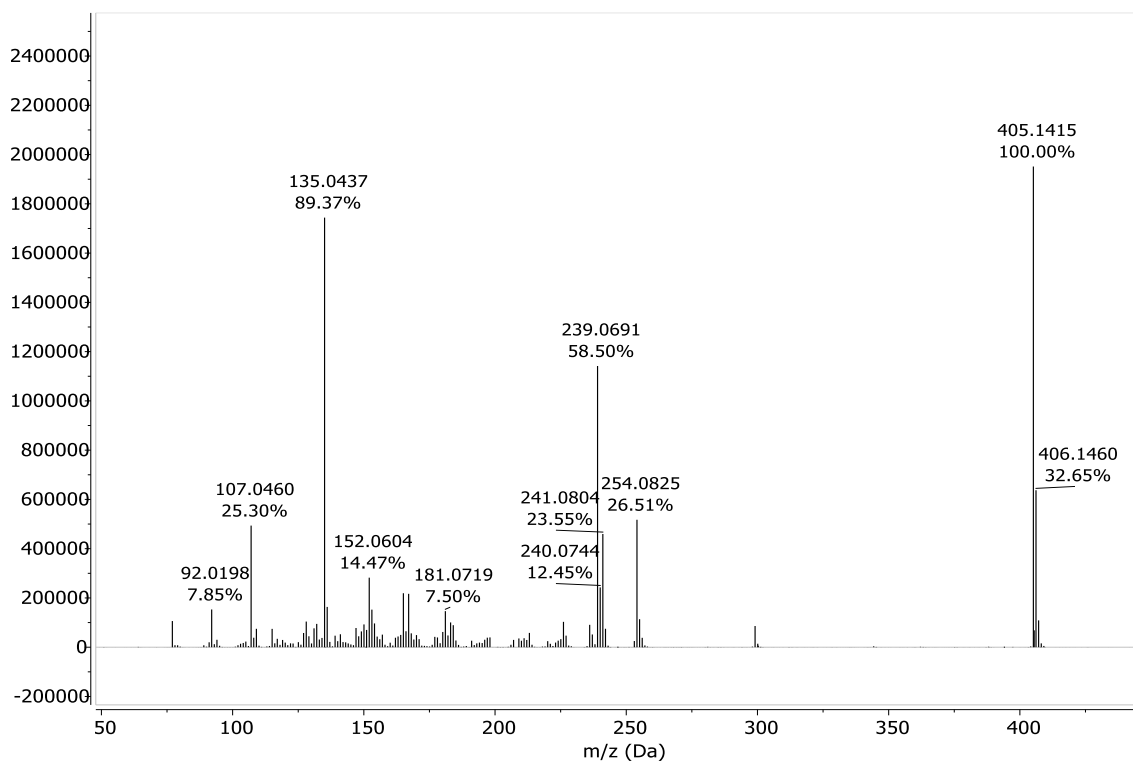

*N'*-((*E*)-2,4-dihydroxy-6-((*E*)-4-hydroxystyryl)benzylidene)-4-fluorobenzohydrazide (**6c**)

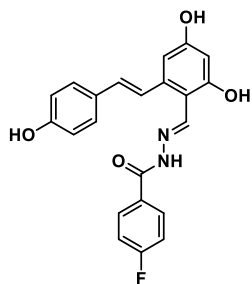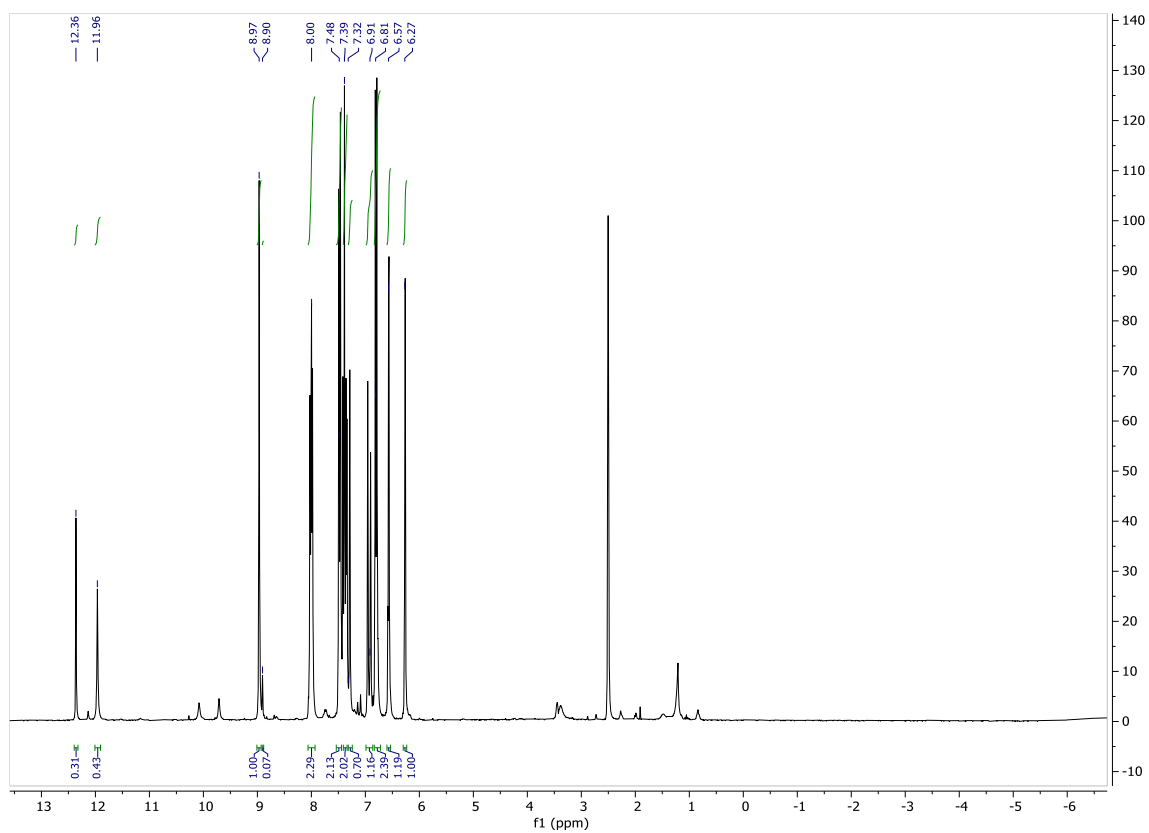

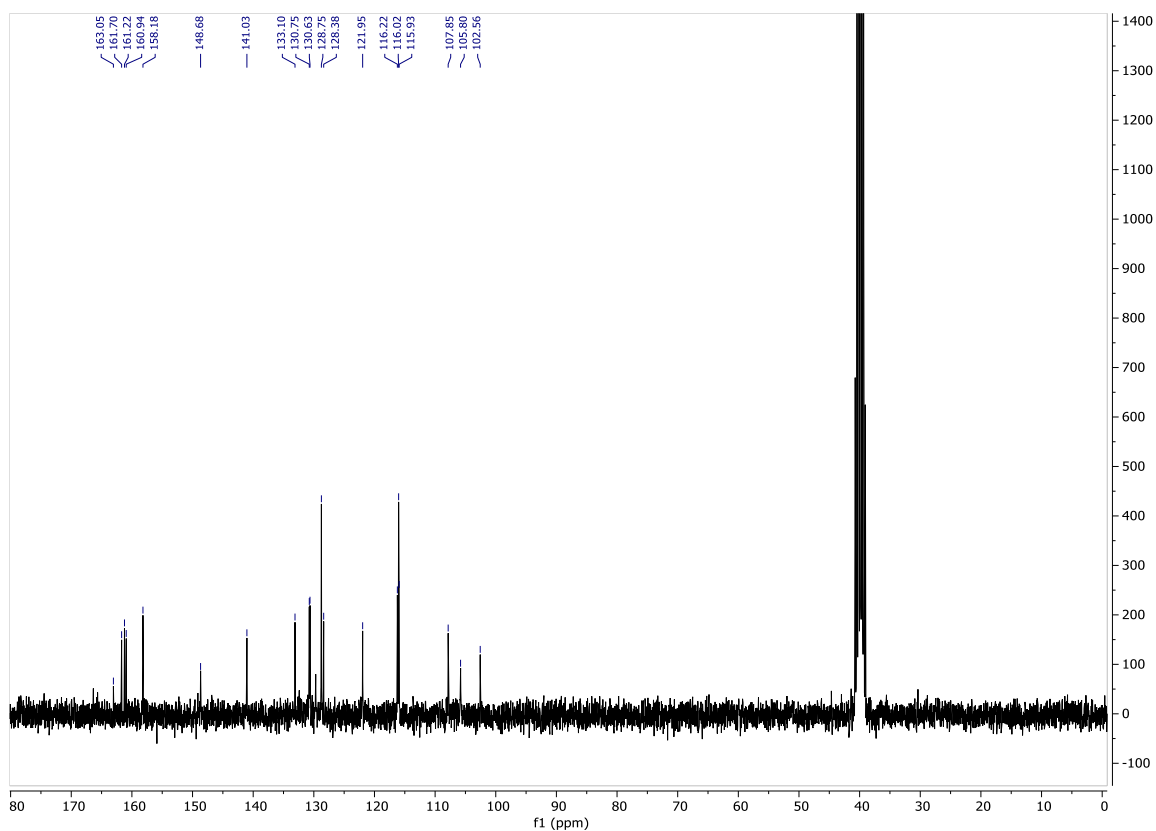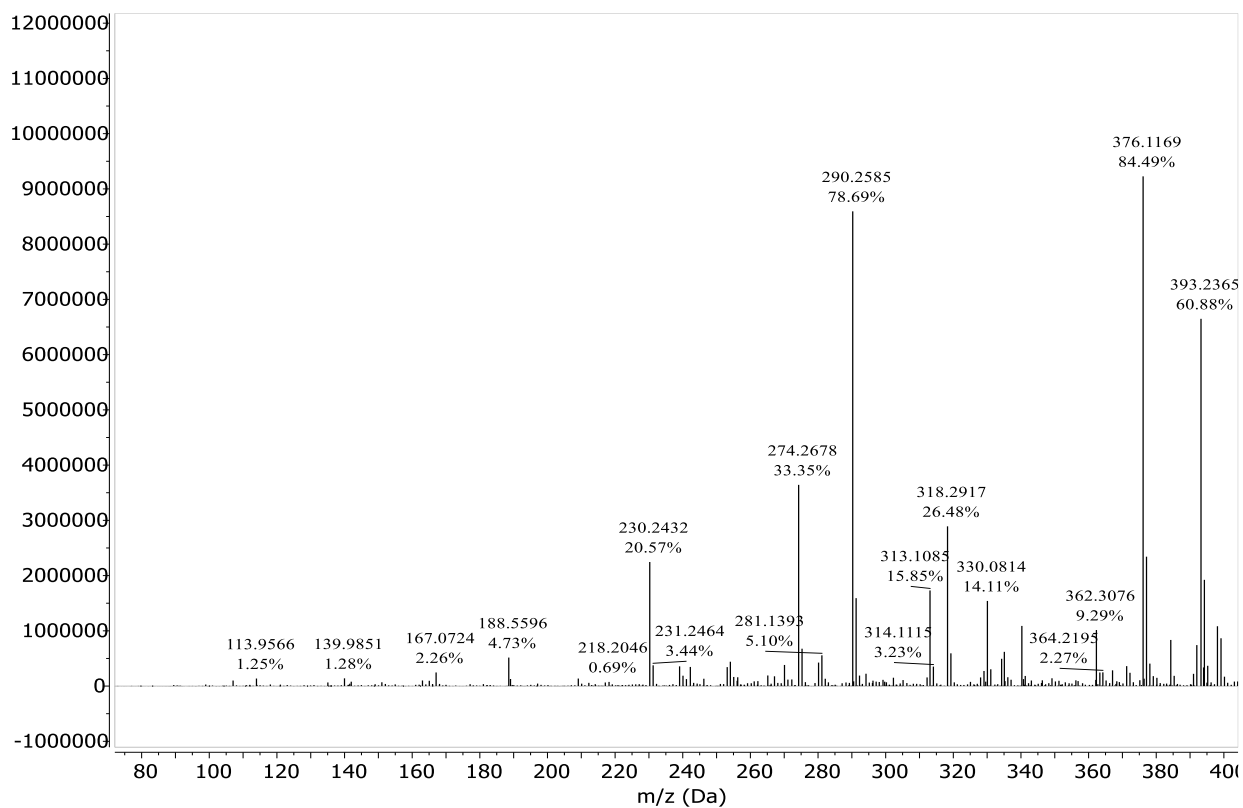



*N'*-((*E*)-2,4-dihydroxy-6-((*E*)-4-hydroxystyryl)benzylidene)-2,3-dimethoxybenzohydrazide (**6d**)

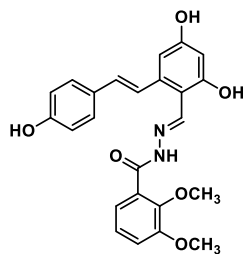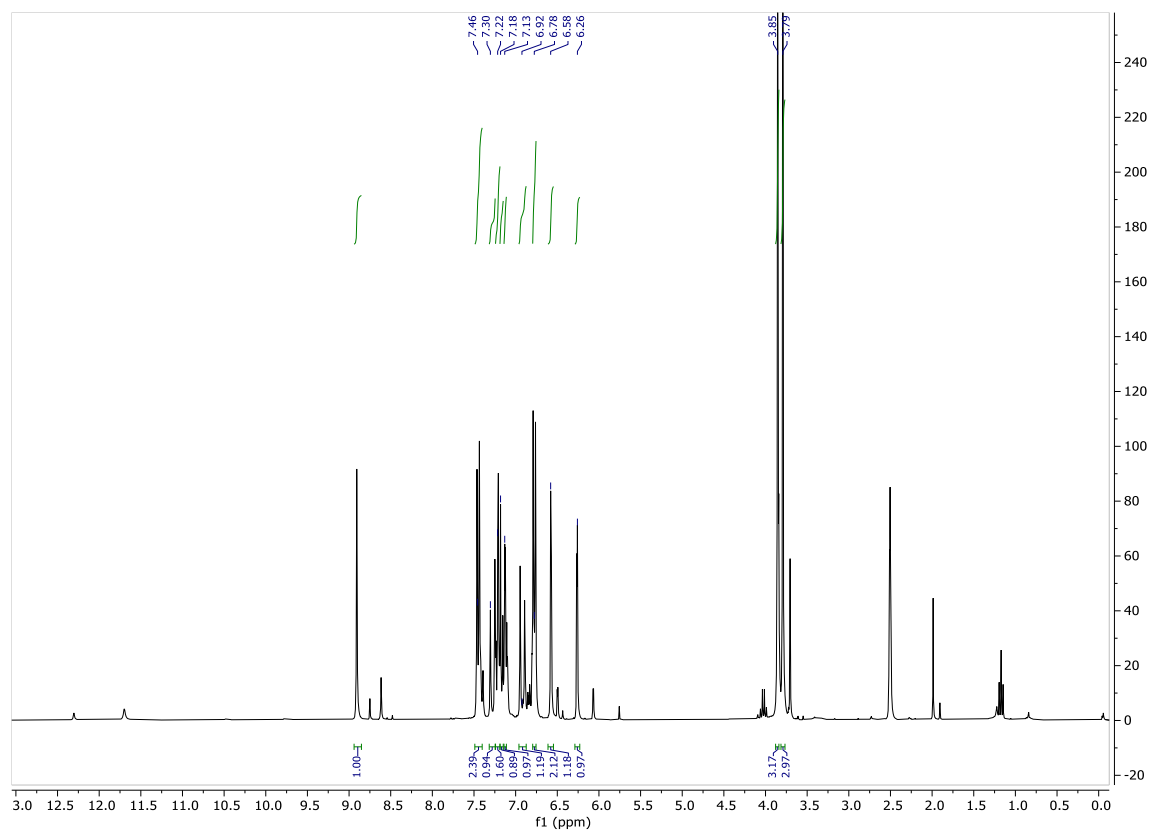

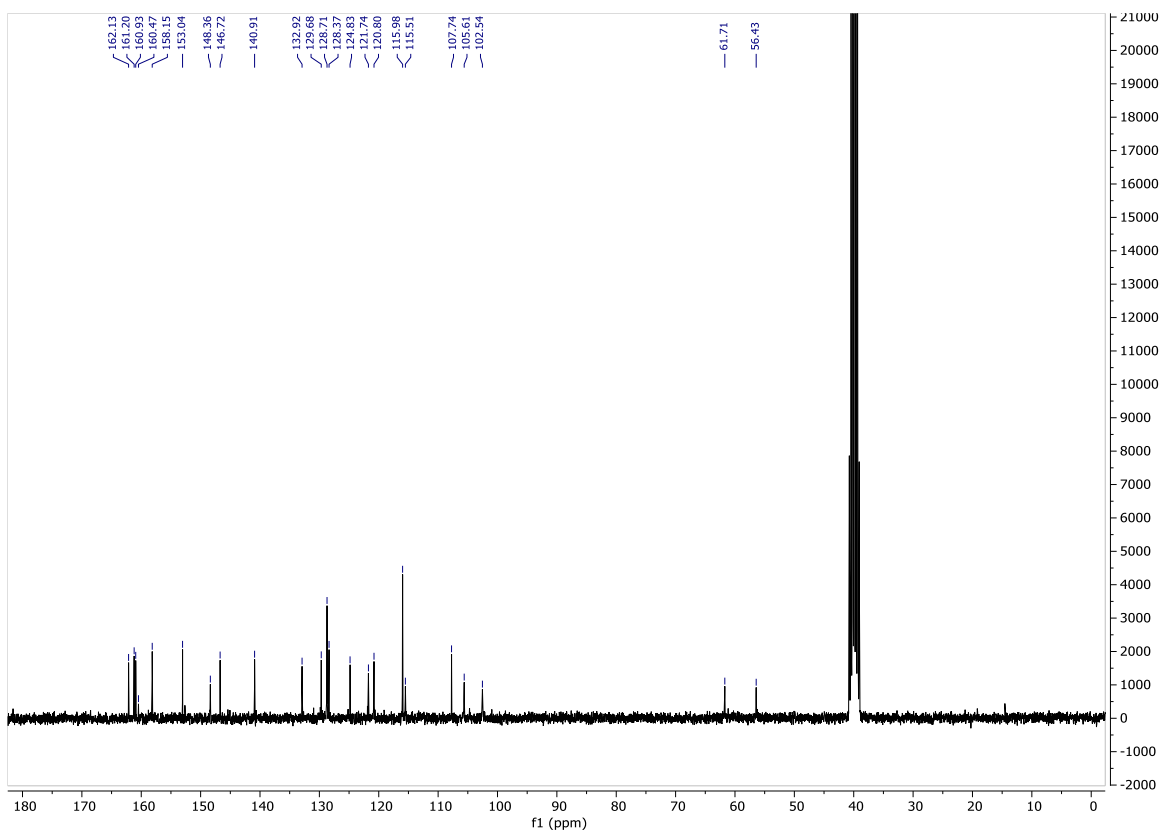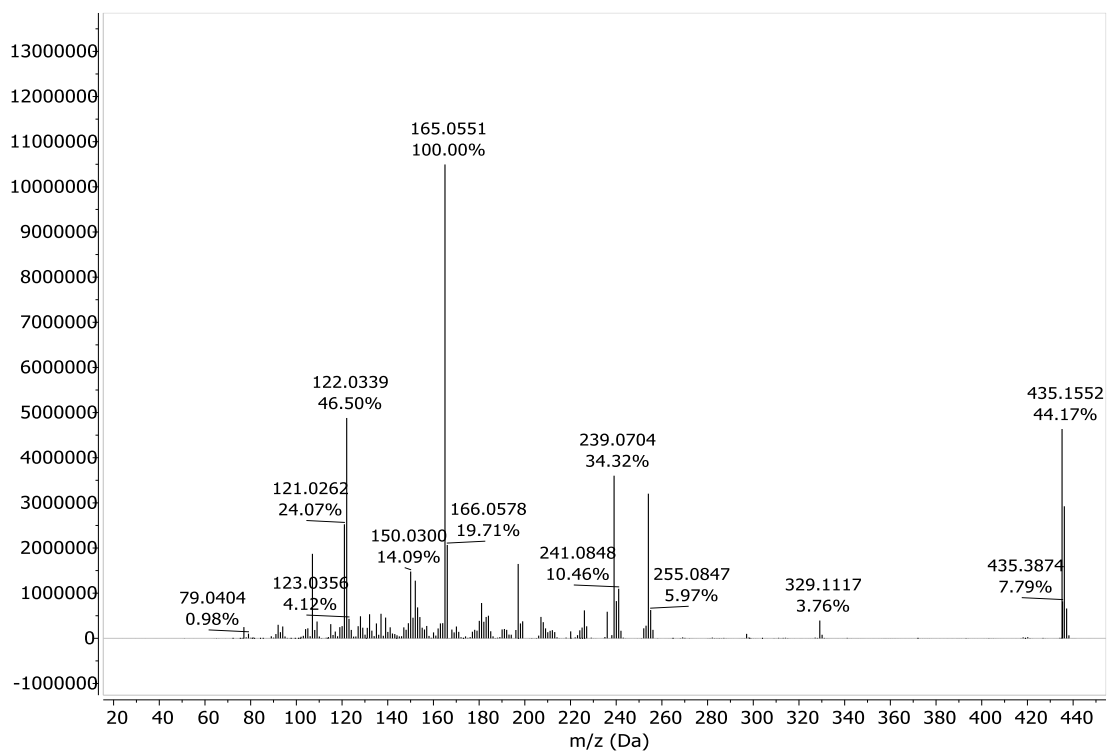

*N'*-((*E*)-2,4-dihydroxy-6-((*E*)-4-hydroxystyryl)benzylidene)-2,4-dimethoxybenzohydrazide (**6e**)

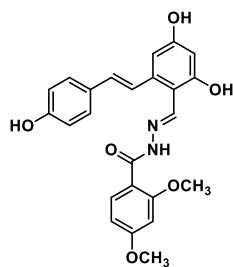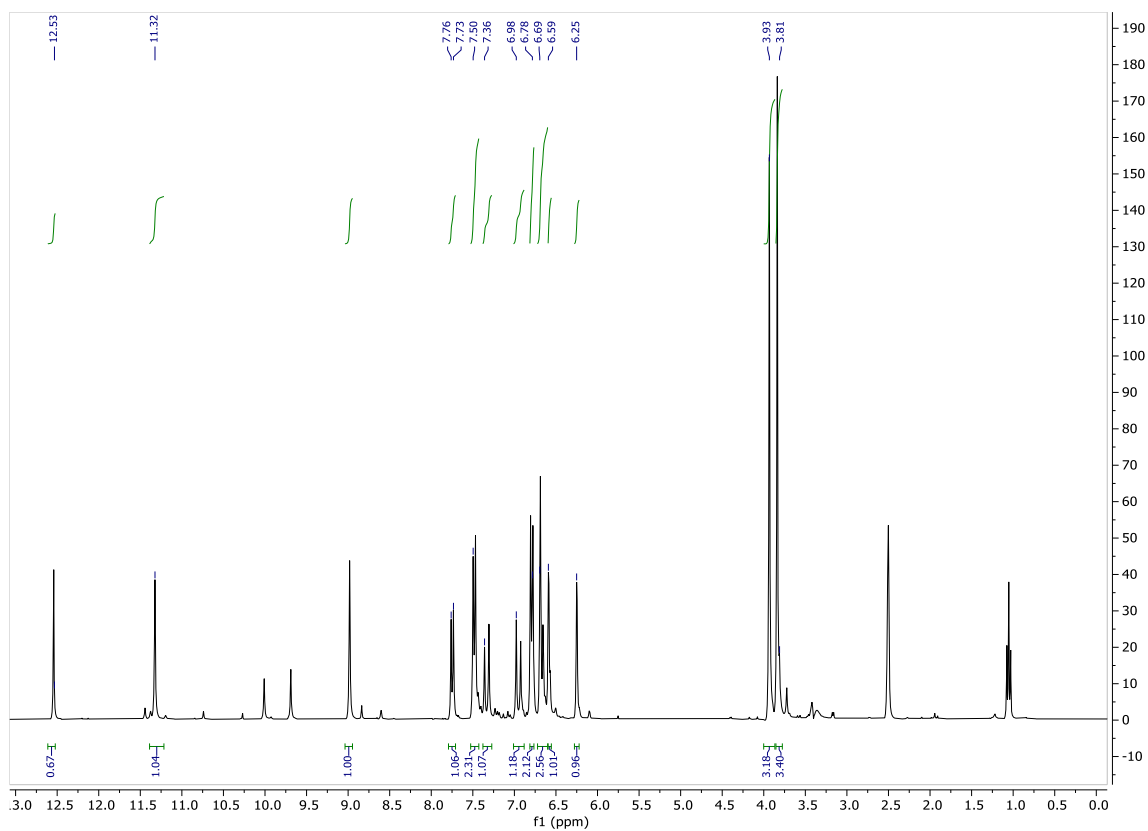

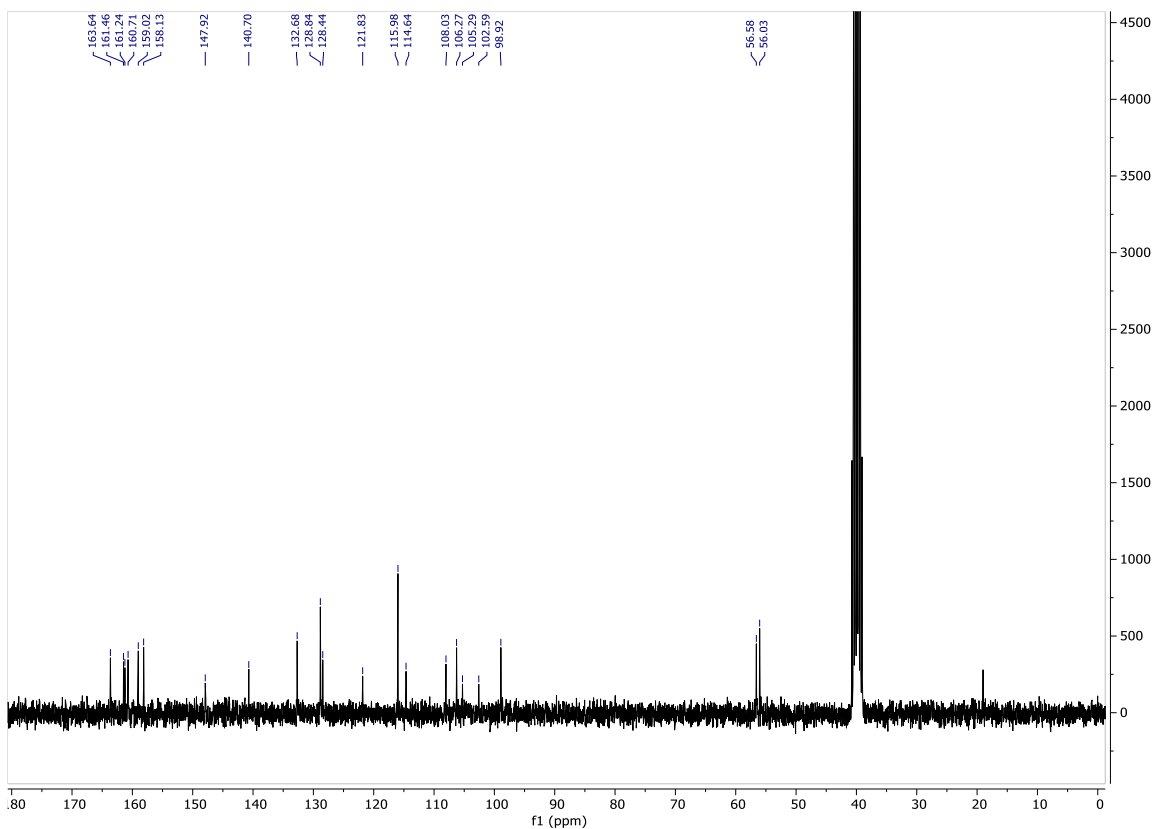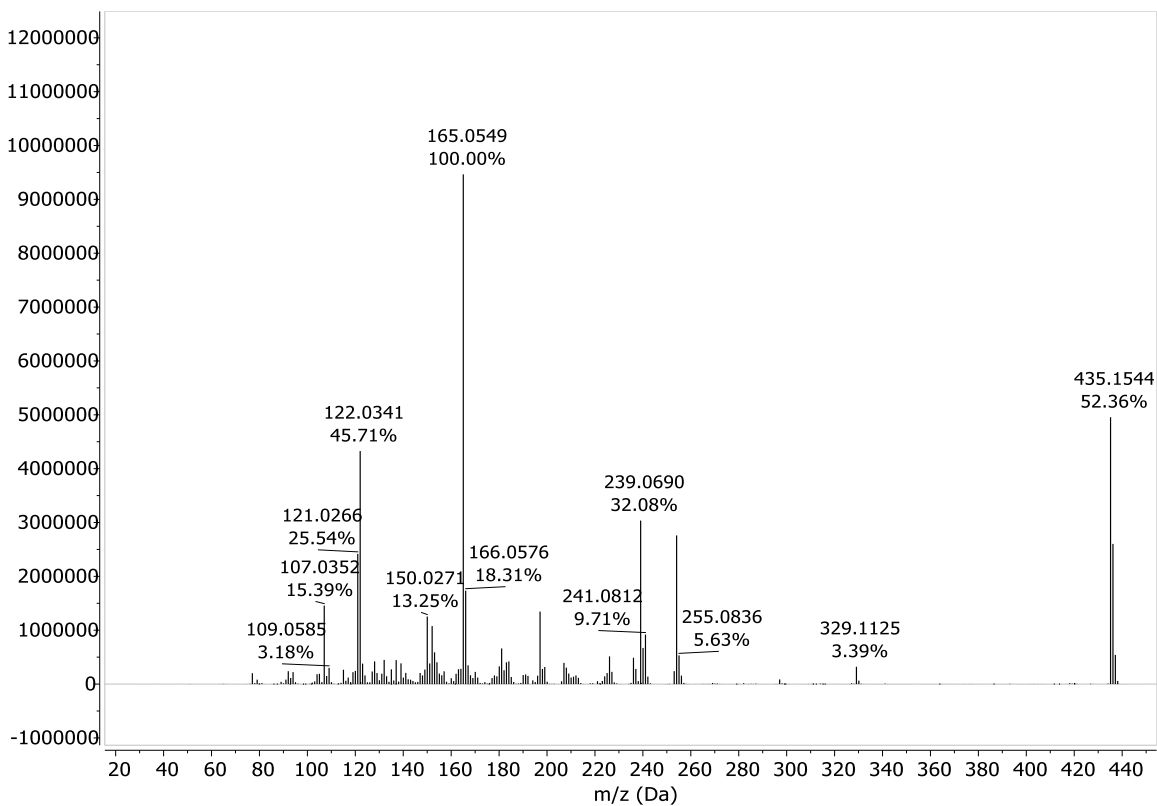

*N'*-((*E*)-2,4-dihydroxy-6-((*E*)-4-hydroxystyryl)benzylidene)-2,5-dimethoxybenzohydrazide (**6f**)

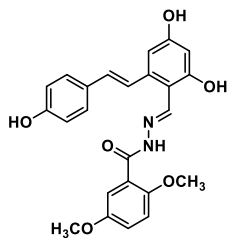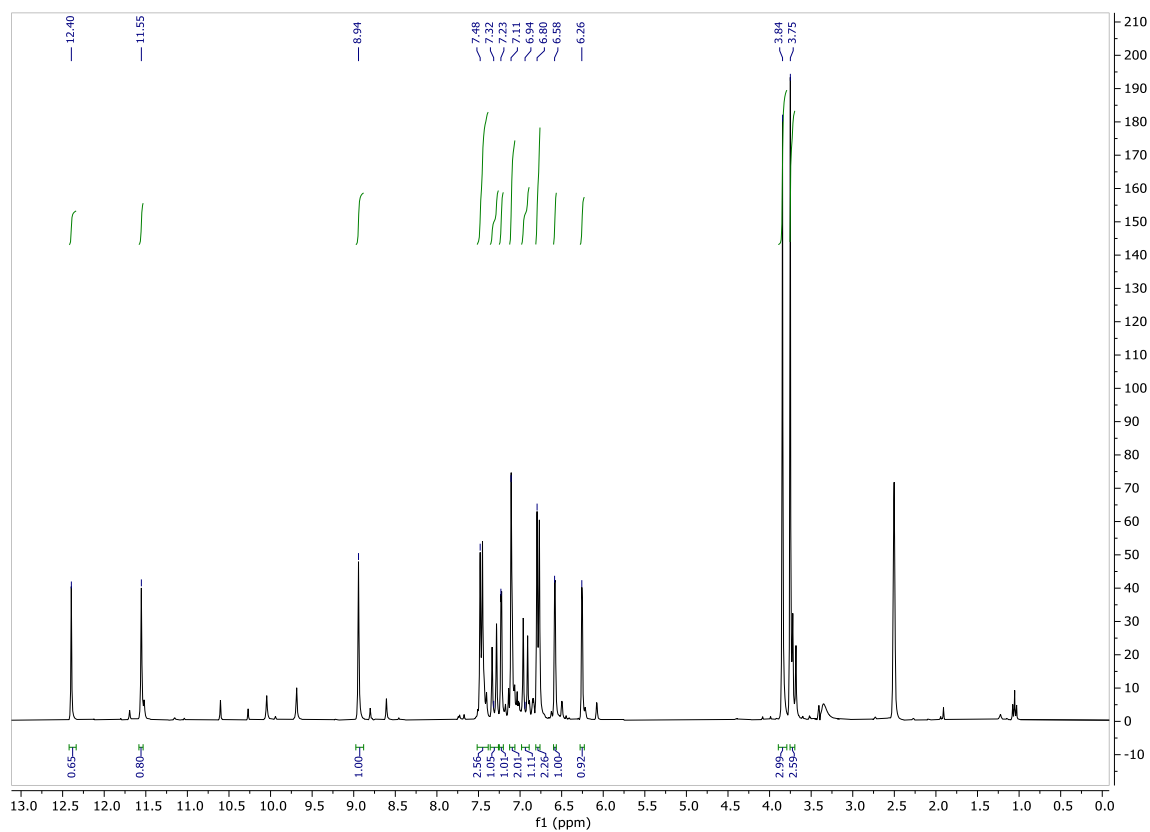

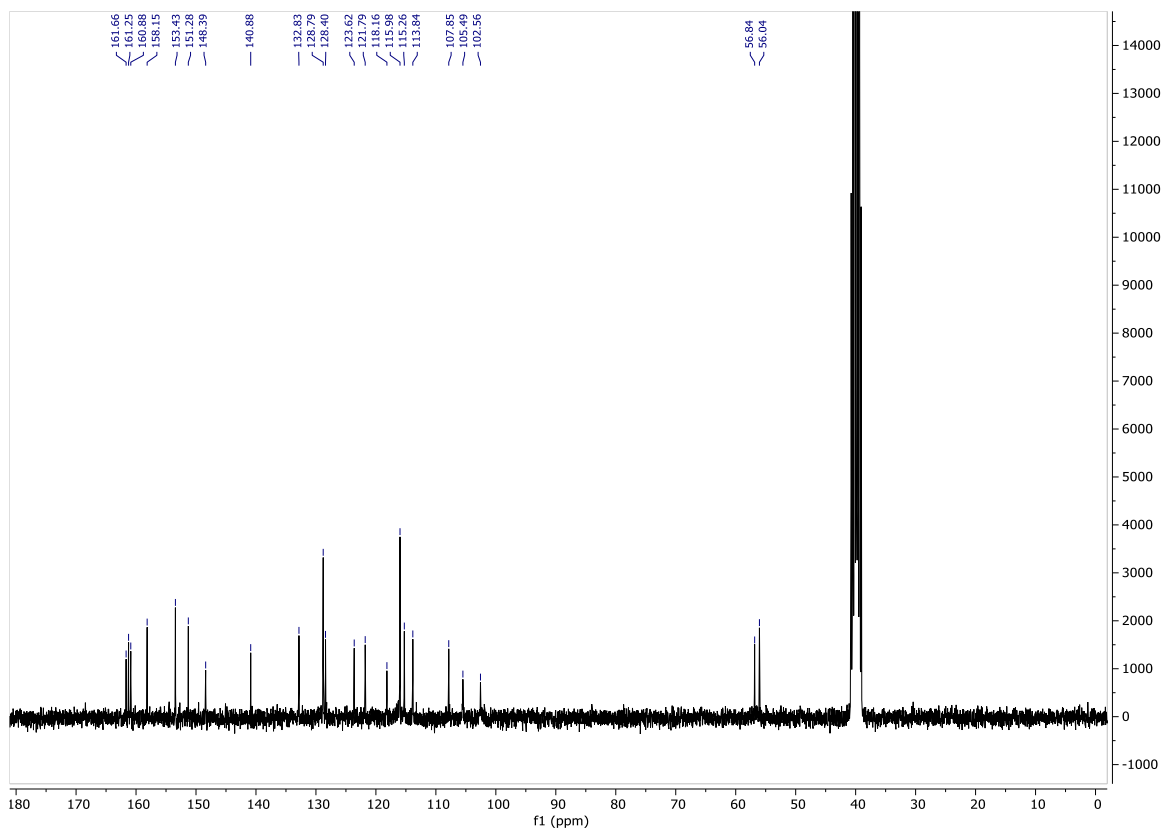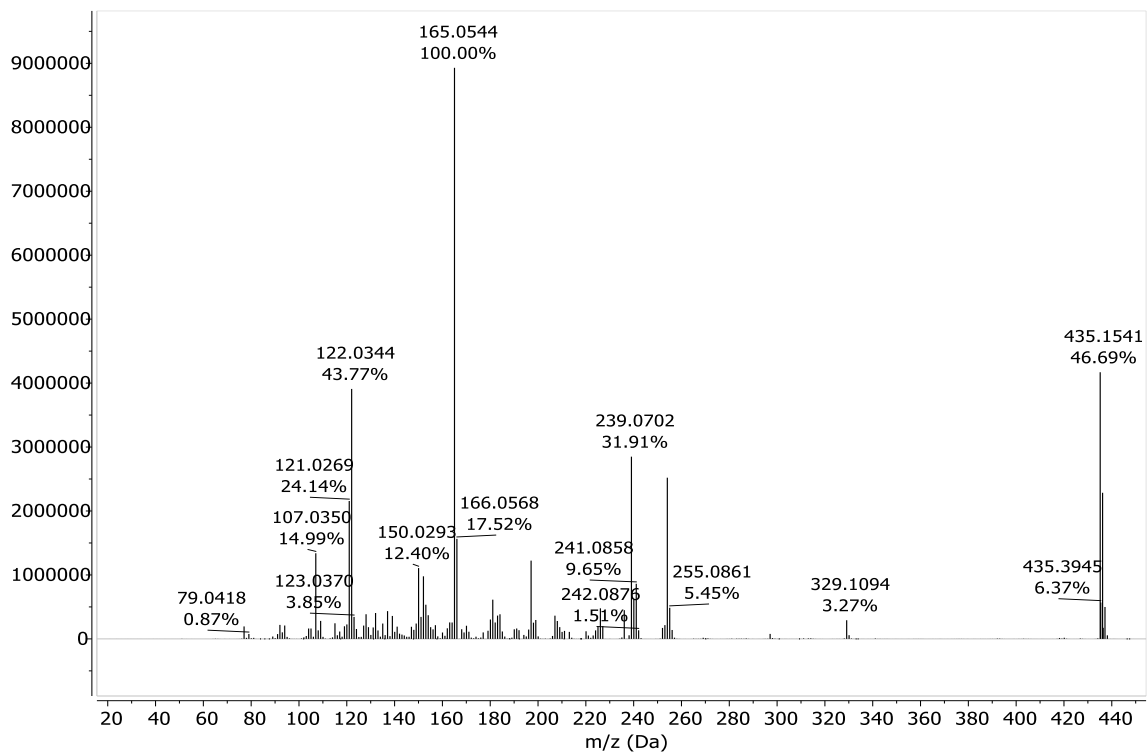

*N'*-((*E*)-2,4-dihydroxy-6-((*E*)-4-hydroxystyryl)benzylidene)-3,4-dimethoxybenzohydrazide (**6g**)

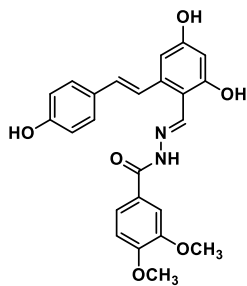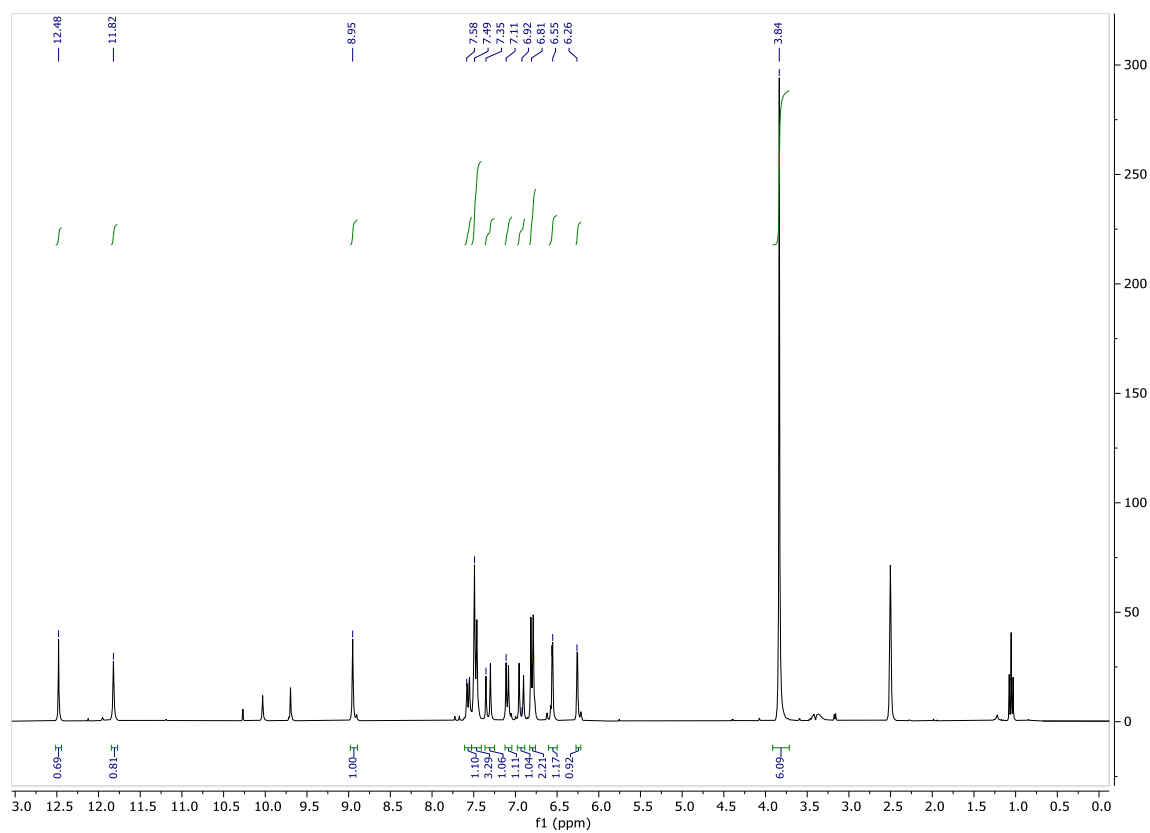

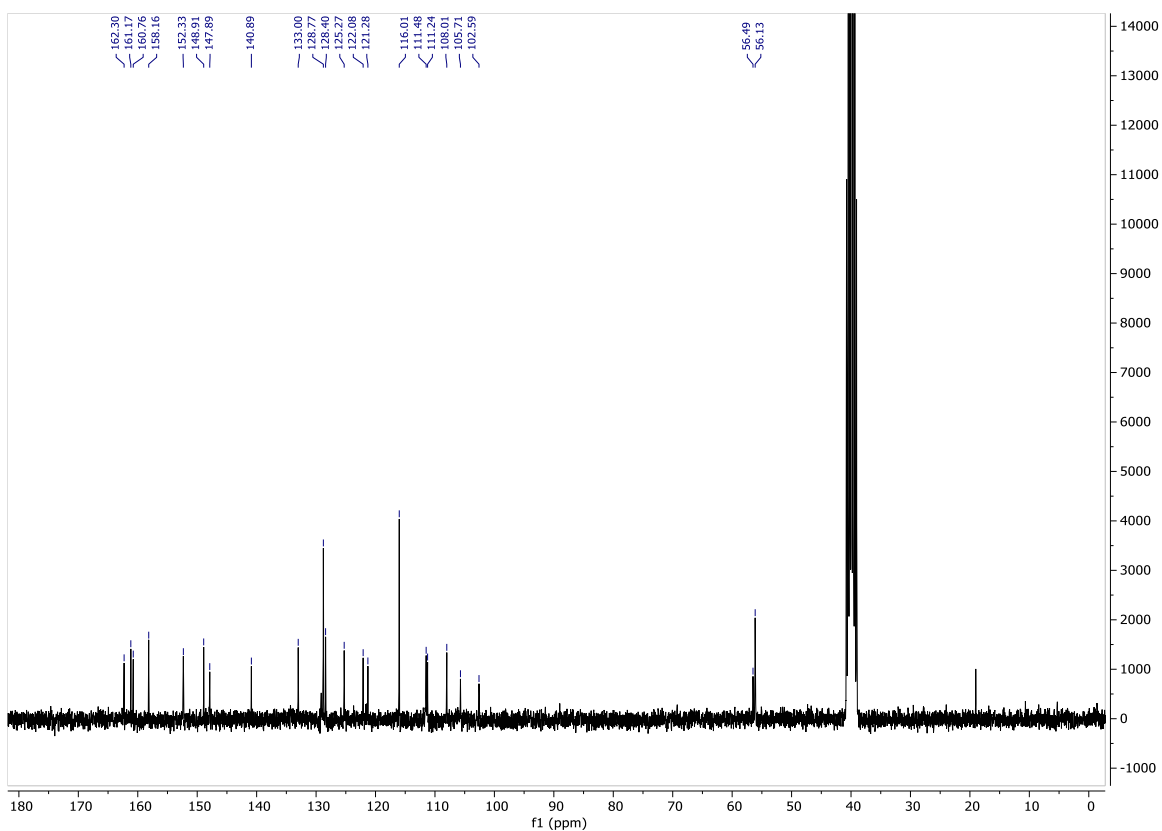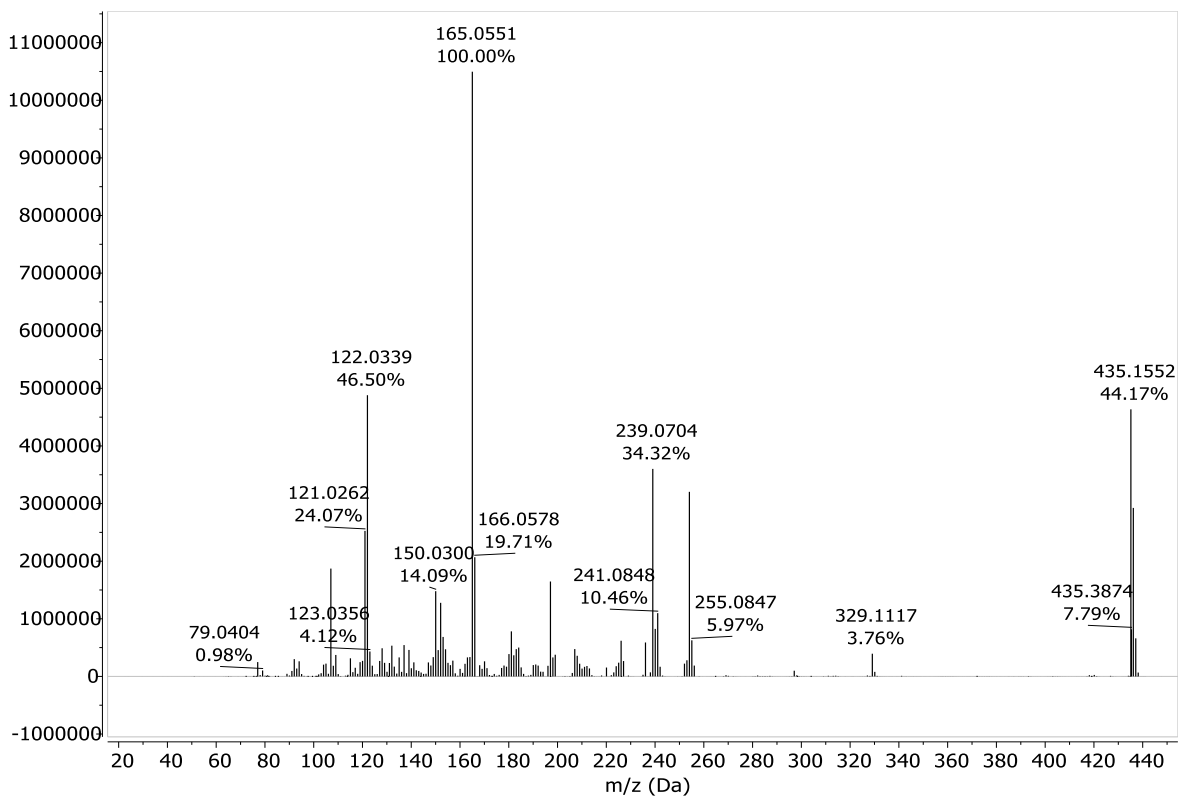



*N'*-((*E*)-2,4-dihydroxy-6-((*E*)-4-hydroxystyryl)benzylidene)-3,5-dimethoxybenzohydrazide (**6h**)

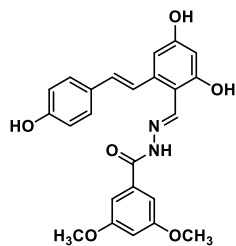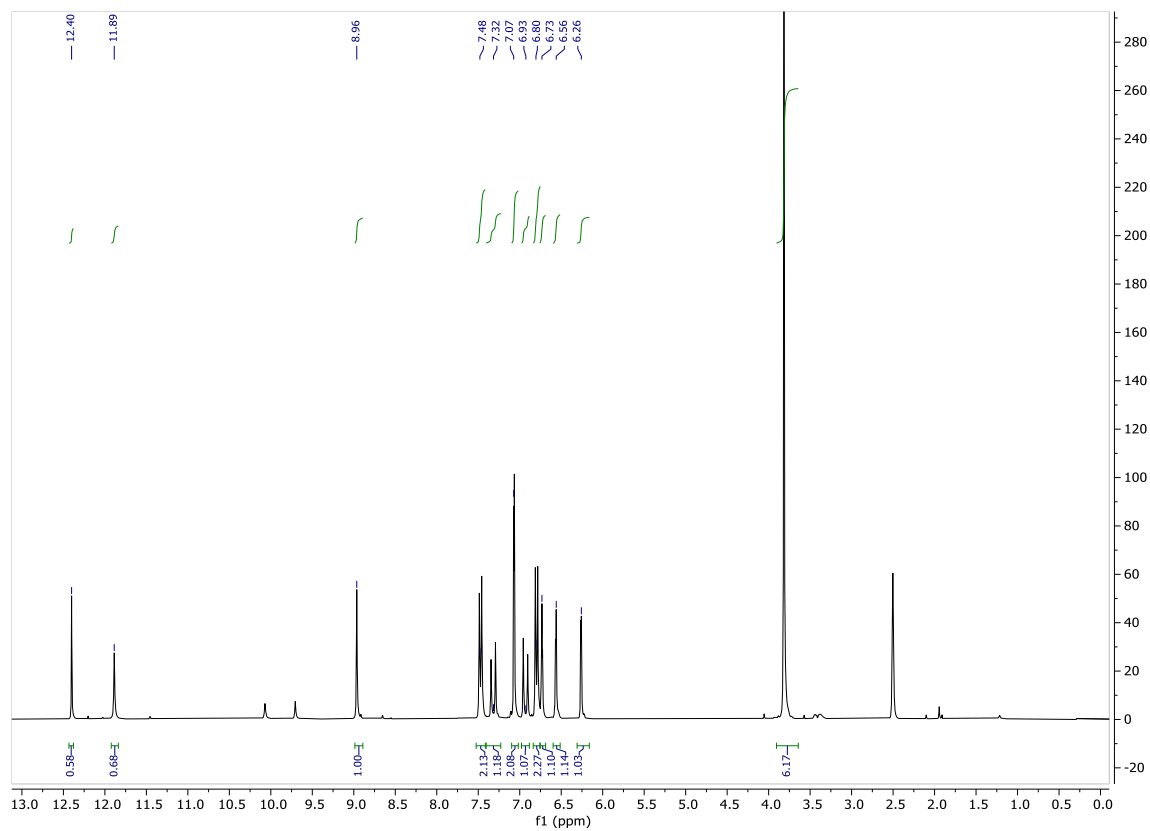

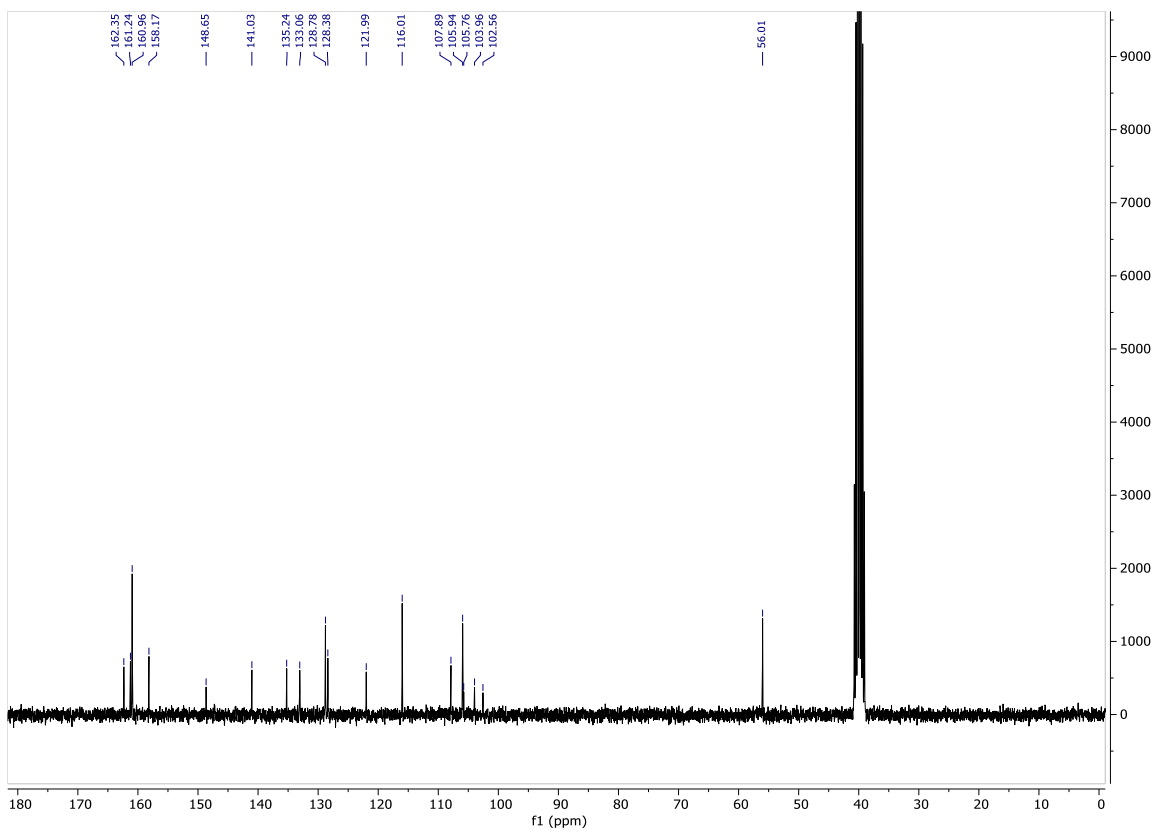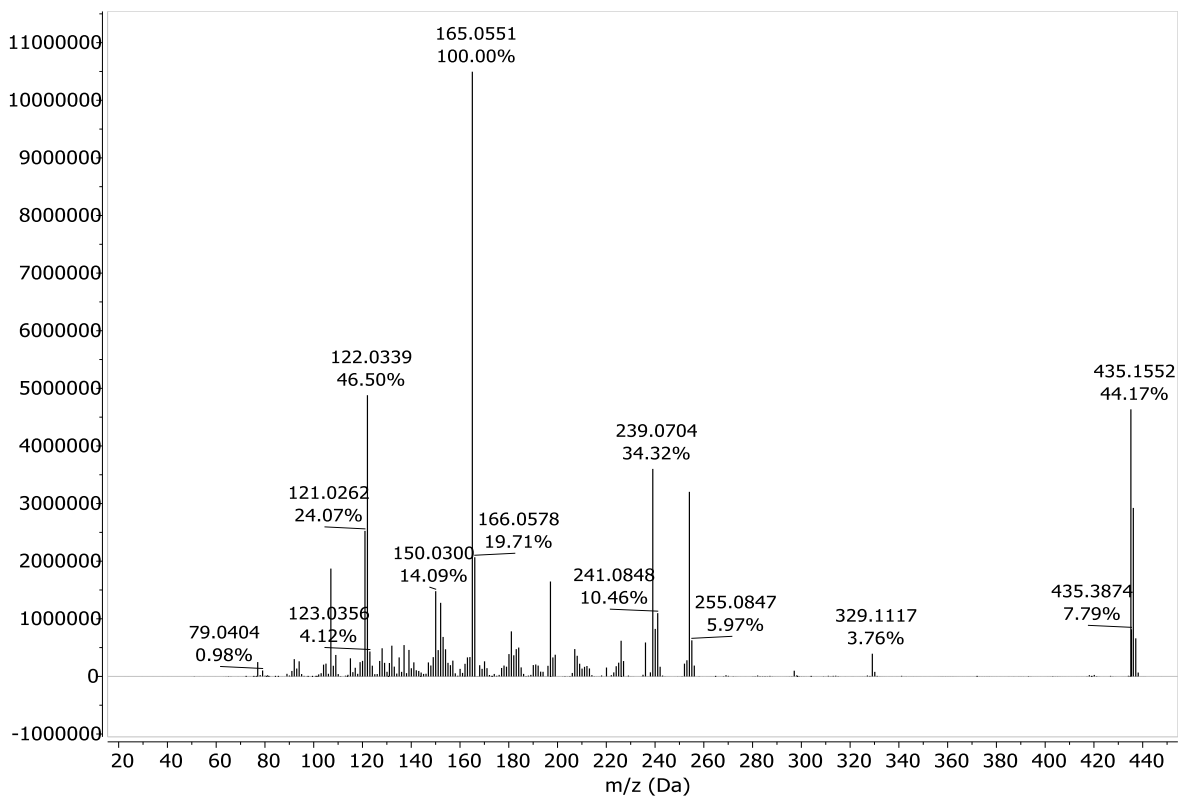

*N'*-((*E*)-2,4-dihydroxy-6-((*E*)-4-hydroxystyryl)benzylidene)isonicotinohydrazide (**7**)

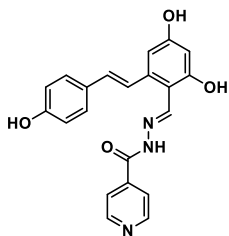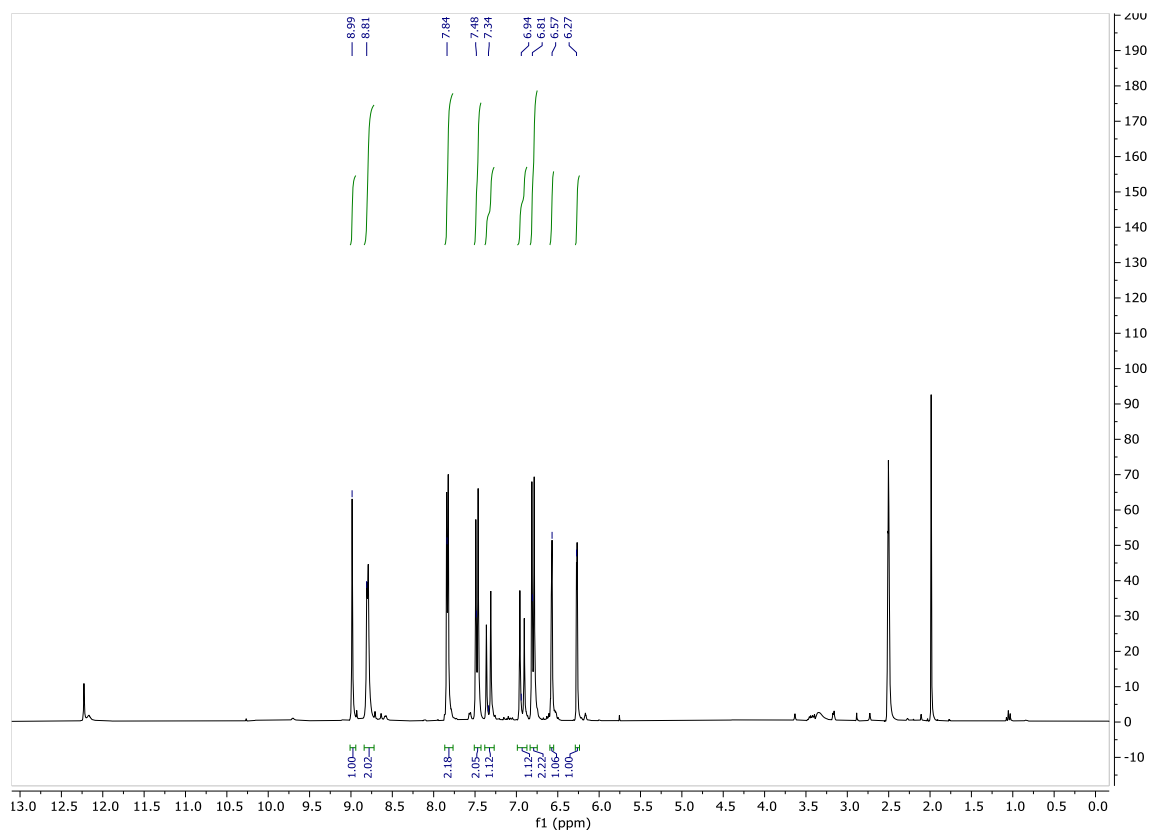

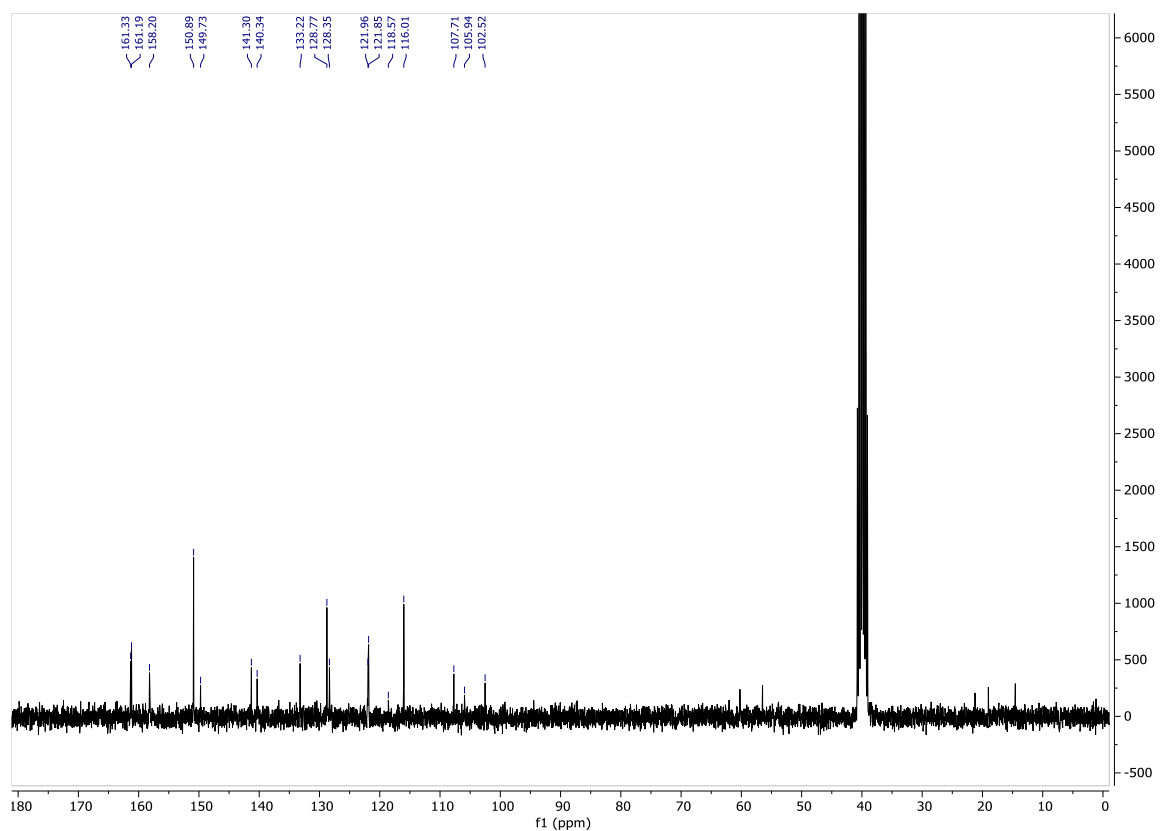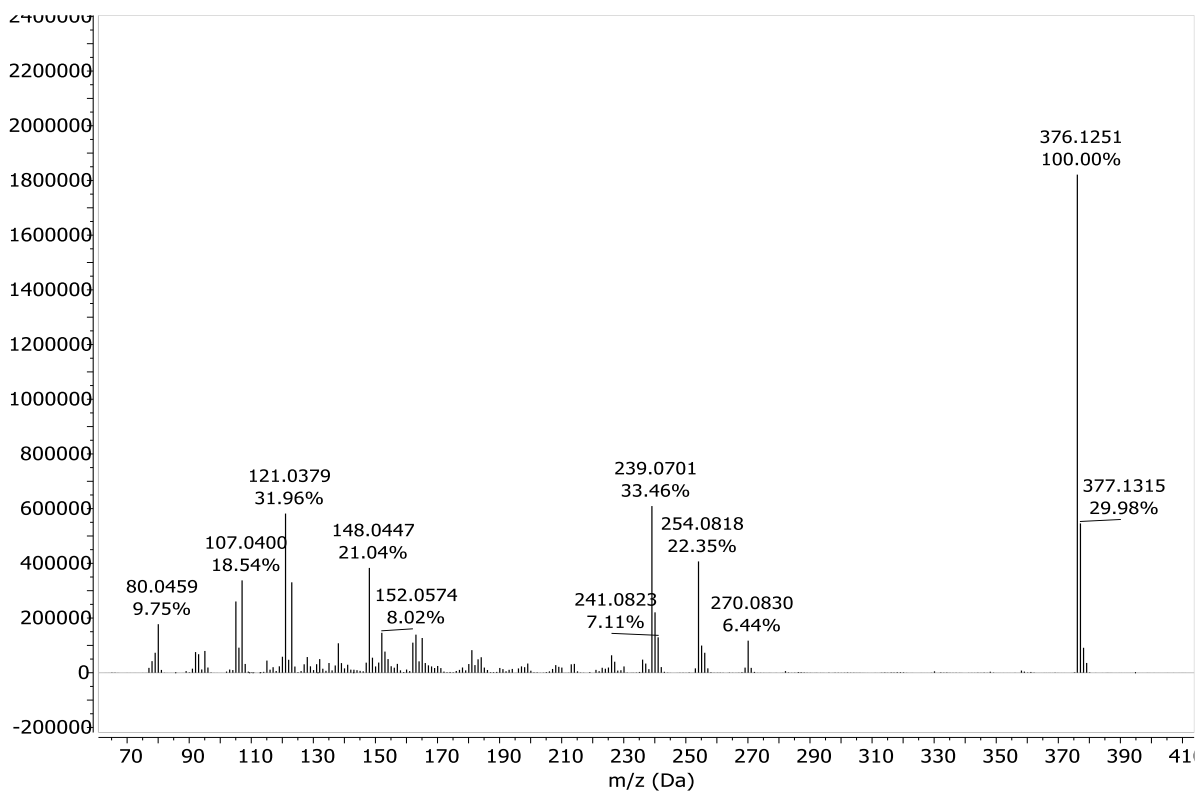

2-((E)-2,4-dihydroxy-6-((E)-4-hydroxystyryl)benzylidene)hydrazine-1-carbothioamide (**8**)

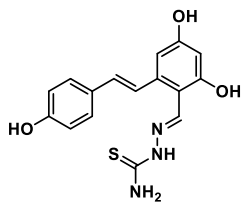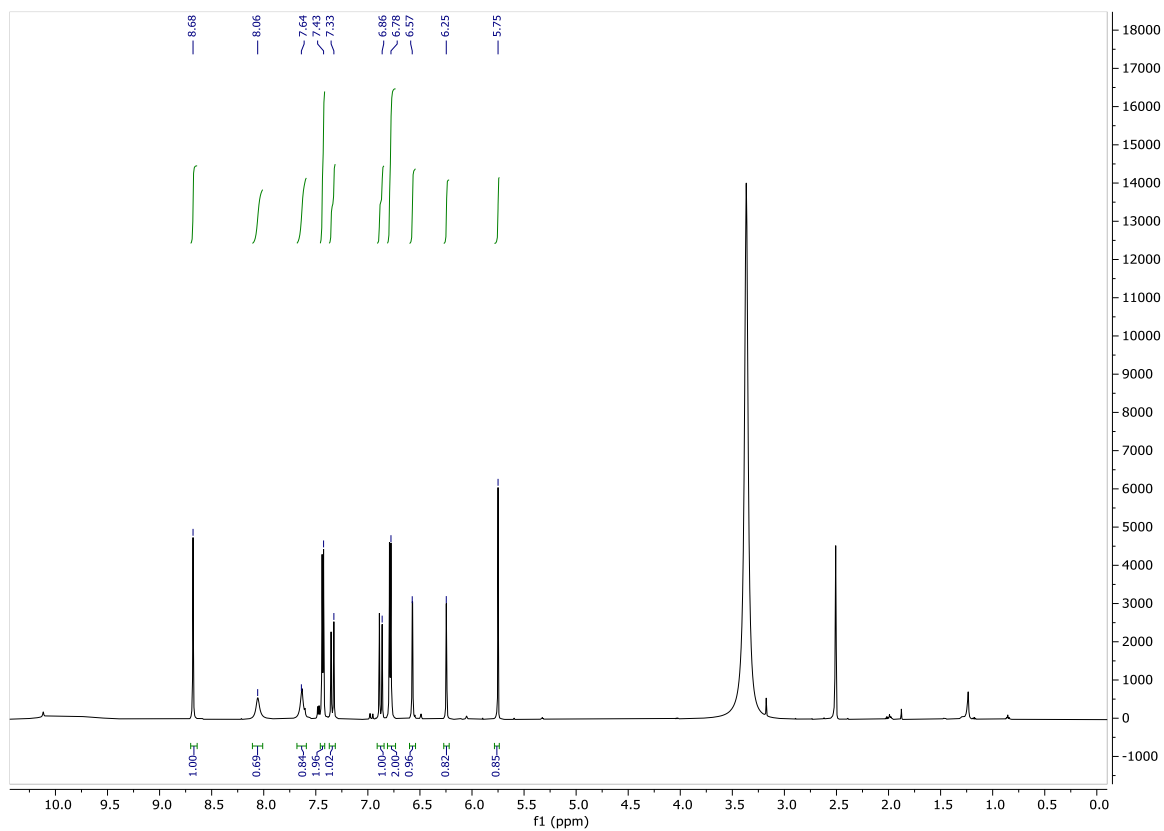

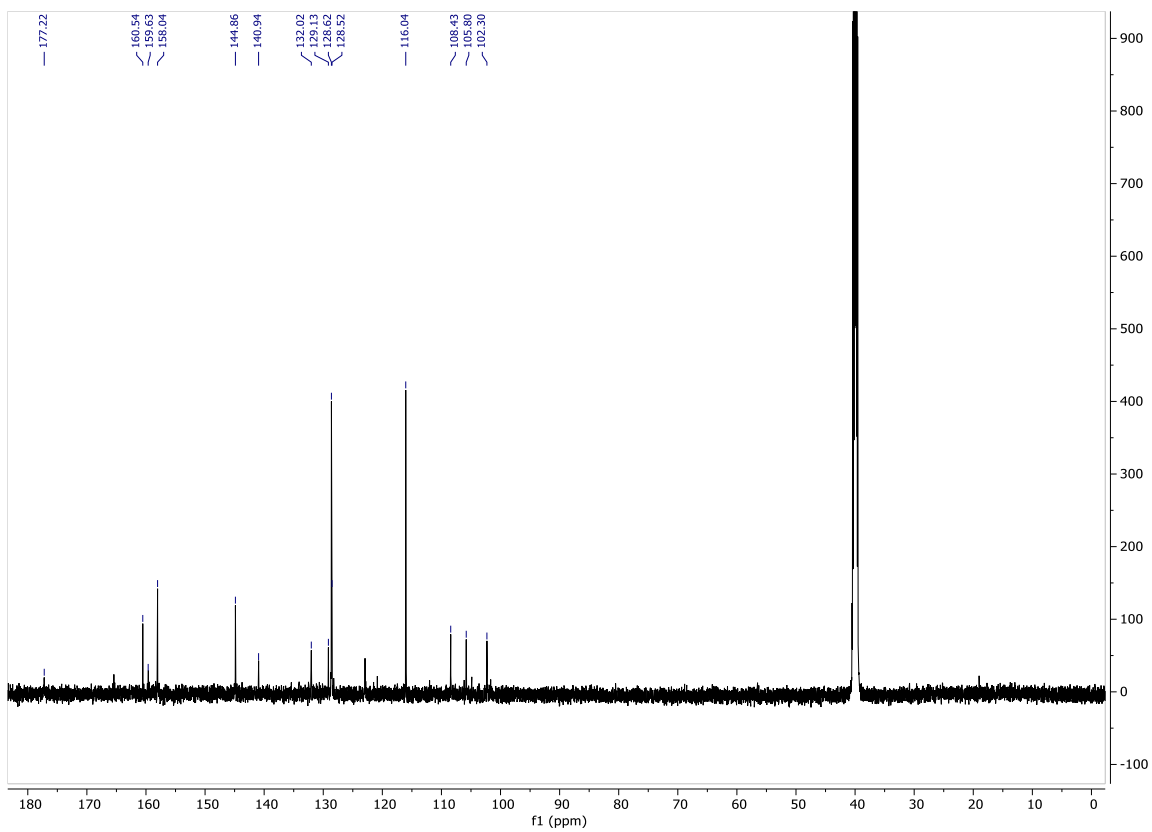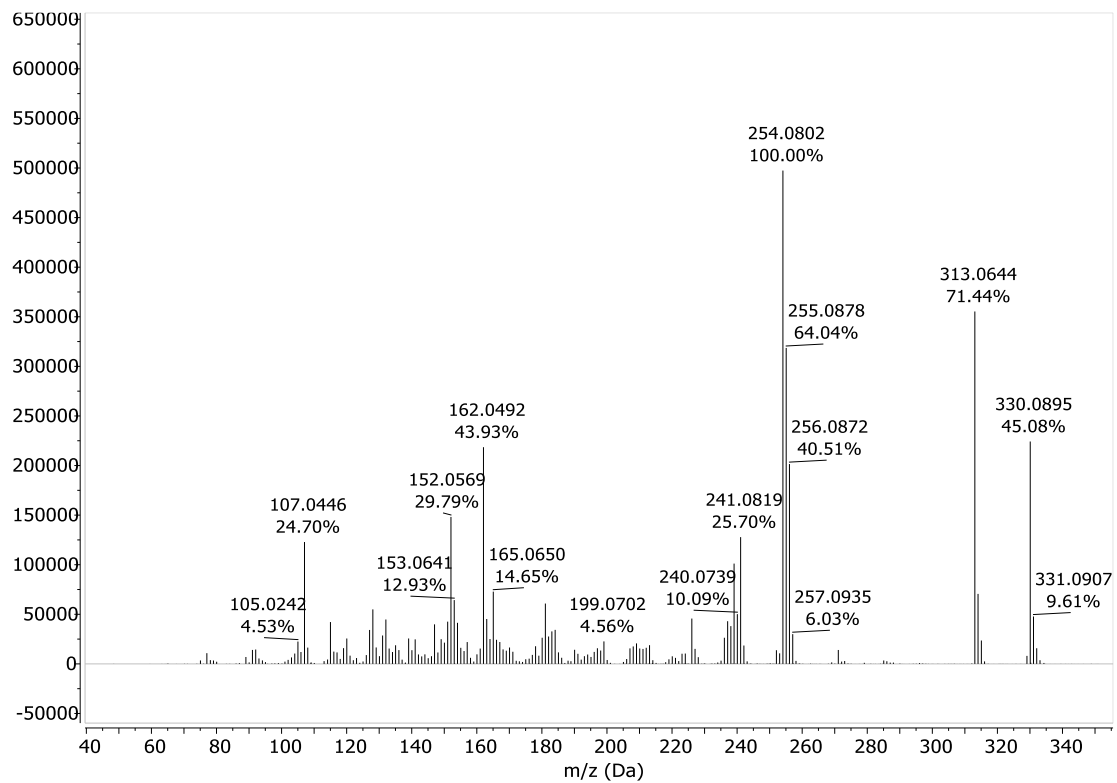

## S2. HPLC analysis

### Chromatogram and Results

#### Injection Details

|                      |                    |                   |          |
|----------------------|--------------------|-------------------|----------|
| Injection Name:      | 7                  | Run Time (min):   | 20,00    |
| Vial Number:         | RB1                | Injection Volume: | 20,00    |
| Injection Type:      | Unknown            | Channel:          | UV_VIS_1 |
| Calibration Level:   |                    | Wavelength:       | 359      |
| Instrument Method:   | Muestras R5 y S1   | Bandwidth:        | n.a.     |
| Processing Method:   | Basic Quantitative | Dilution Factor:  | 1,0000   |
| Injection Date/Time: | 08/sep./22 11:45   | Sample Weight:    | 1,0000   |

#### Chromatogram

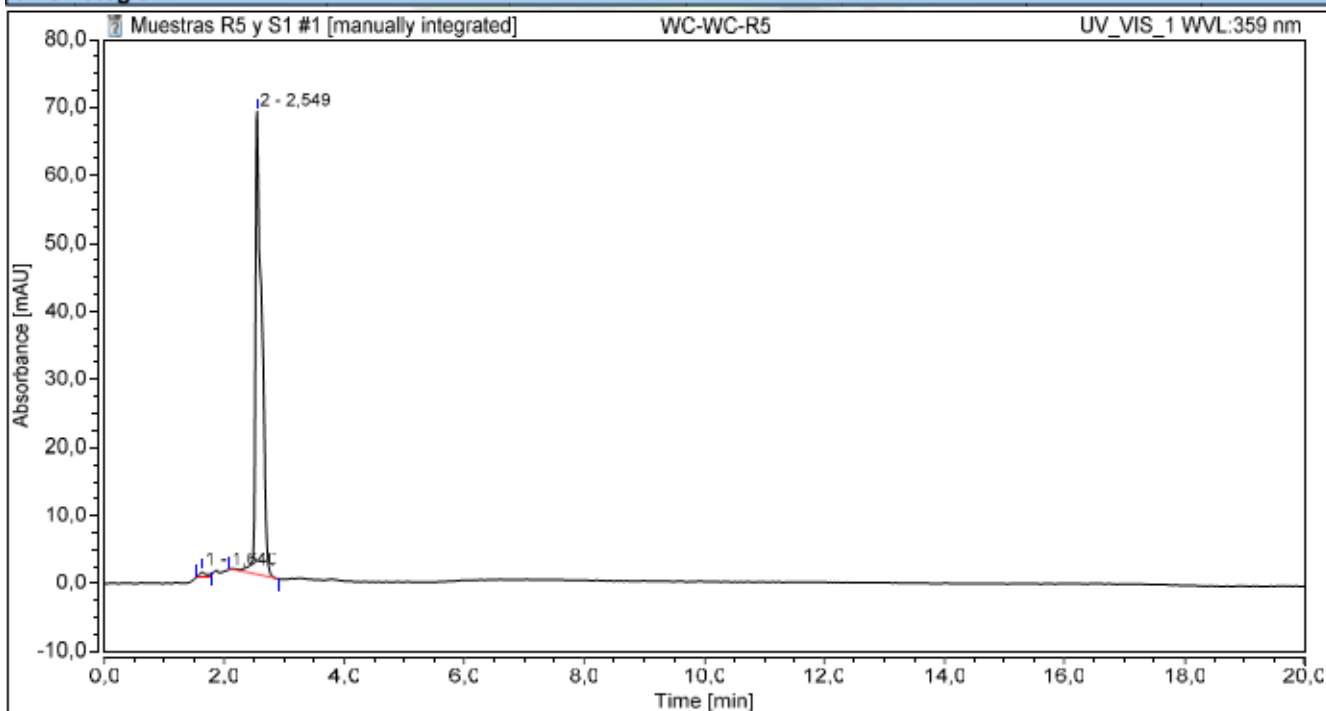

#### Integration Results

| No.           | Peak Name | Retention Time<br>min | Area<br>mAU*min | Height<br>mAU | Relative Area<br>% | Relative Height<br>% | Amount<br>n.a. |
|---------------|-----------|-----------------------|-----------------|---------------|--------------------|----------------------|----------------|
| 1             |           | 1,640                 | 0,044           | 0,569         | 0,53               | 0,83                 | n.a.           |
| 2             |           | 2,549                 | 8,156           | 68,097        | 99,47              | 99,17                | n.a.           |
| <b>Total:</b> |           |                       | <b>8,200</b>    | <b>68,666</b> | <b>100,00</b>      | <b>100,00</b>        |                |

## Chromatogram and Results

### Injection Details

|                      |                    |                   |          |
|----------------------|--------------------|-------------------|----------|
| Injection Name:      | 6E                 | Run Time (min):   | 20,00    |
| Vial Number:         | RB2                | Injection Volume: | 20,00    |
| Injection Type:      | Unknown            | Channel:          | UV_VIS_1 |
| Calibration Level:   |                    | Wavelength:       | 359      |
| Instrument Method:   | Muestras R5 y S1   | Bandwidth:        | n.a.     |
| Processing Method:   | Basic Quantitative | Dilution Factor:  | 1,0000   |
| Injection Date/Time: | 08/sep./22 12:06   | Sample Weight:    | 1,0000   |

### Chromatogram

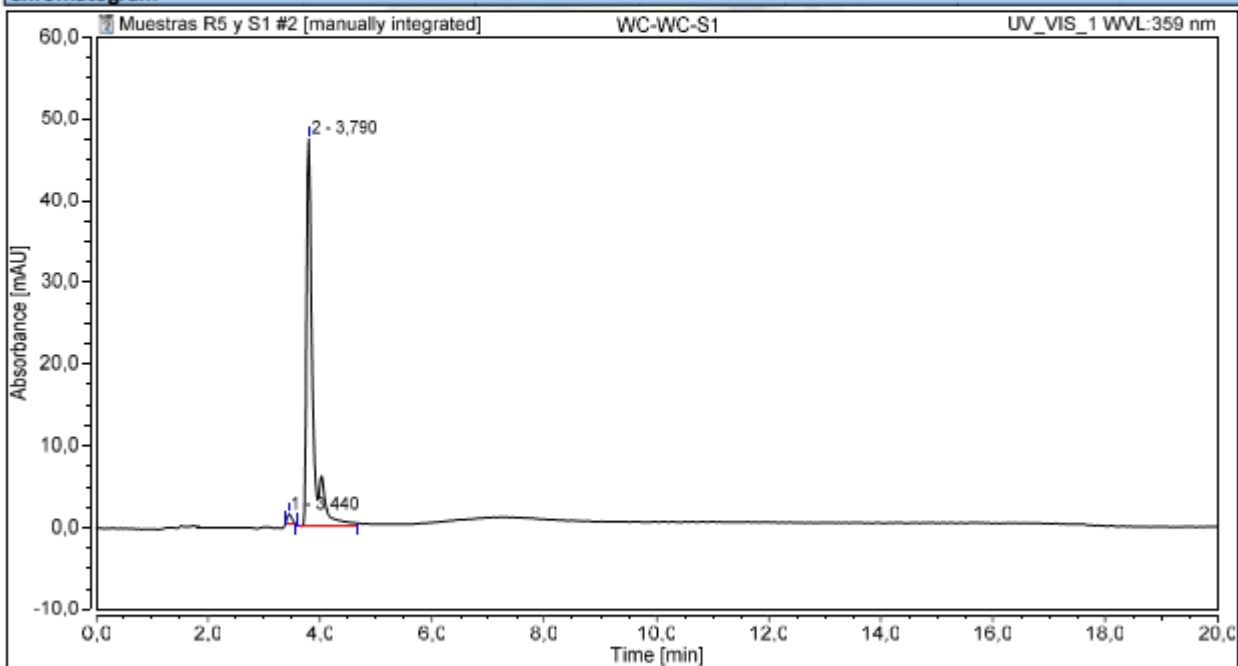

### Integration Results

| No.           | Peak Name | Retention Time<br>min | Area<br>mAU*min | Height<br>mAU | Relative Area<br>% | Relative Height<br>% | Amount<br>n.a. |
|---------------|-----------|-----------------------|-----------------|---------------|--------------------|----------------------|----------------|
| 1             |           | 3,440                 | 0,111           | 1,180         | 1,85               | 2,44                 | n.a.           |
| 2             |           | 3,790                 | 5,875           | 47,225        | 98,15              | 97,56                | n.a.           |
| <b>Total:</b> |           |                       | <b>5,985</b>    | <b>48,405</b> | <b>100,00</b>      | <b>100,00</b>        |                |
